# Supplementary material
Source: HighWire-hosted journal article supplement (https://jnm.snmjournals.org/highwire/filestream/95262/field_highwire_adjunct_files/0/191916_Supplemental_Data.pdf)
Supplement: 191916_Supplemental_Data.pdf [file 191916_Supplemental_Data.pdf]

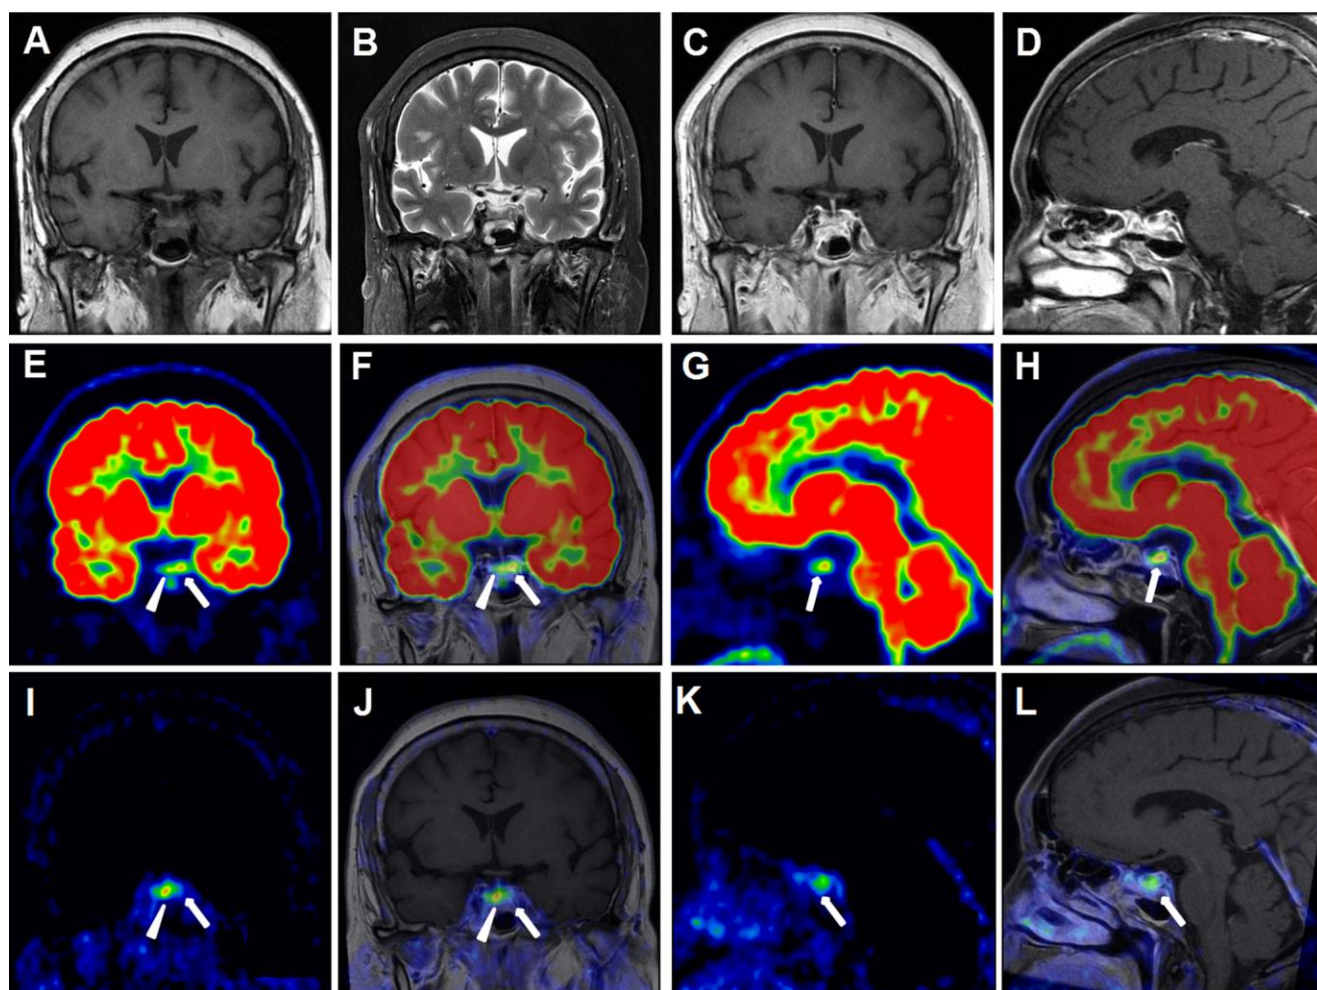

Supplemental Fig. 1 MRI and  $^{18}\text{F}$ -FDG/ $^{68}\text{Ga}$ -DOTATATE PET/MR images of a 50-year-old woman with elevated ACTH levels 3 months after removal of an ACTH-secreting pituitary adenoma (patient No. 25 in Table 1). The MRI images showed only post-surgery changes (A-D: T1 coronal, T2 coronal, enhanced T1 coronal and sagittal views). The PET/MR images clearly showed an  $^{18}\text{F}$ -FDG avid lesion (arrow) at the left side of the sella turcica (E-H: coronal view, coronal fusion, sagittal view and sagittal fusion), with lower  $^{68}\text{Ga}$ -DOTATATE uptake than the remain pituitary tissue at the center region (triangle) (I-L: coronal view, coronal fusion, sagittal view and sagittal fusion). The follow-up surgery confirmed a left side recurrent functional pituitary adenoma ( $4 \times 3 \times 3 \text{ mm}^3$ ) with positive ACTH stain

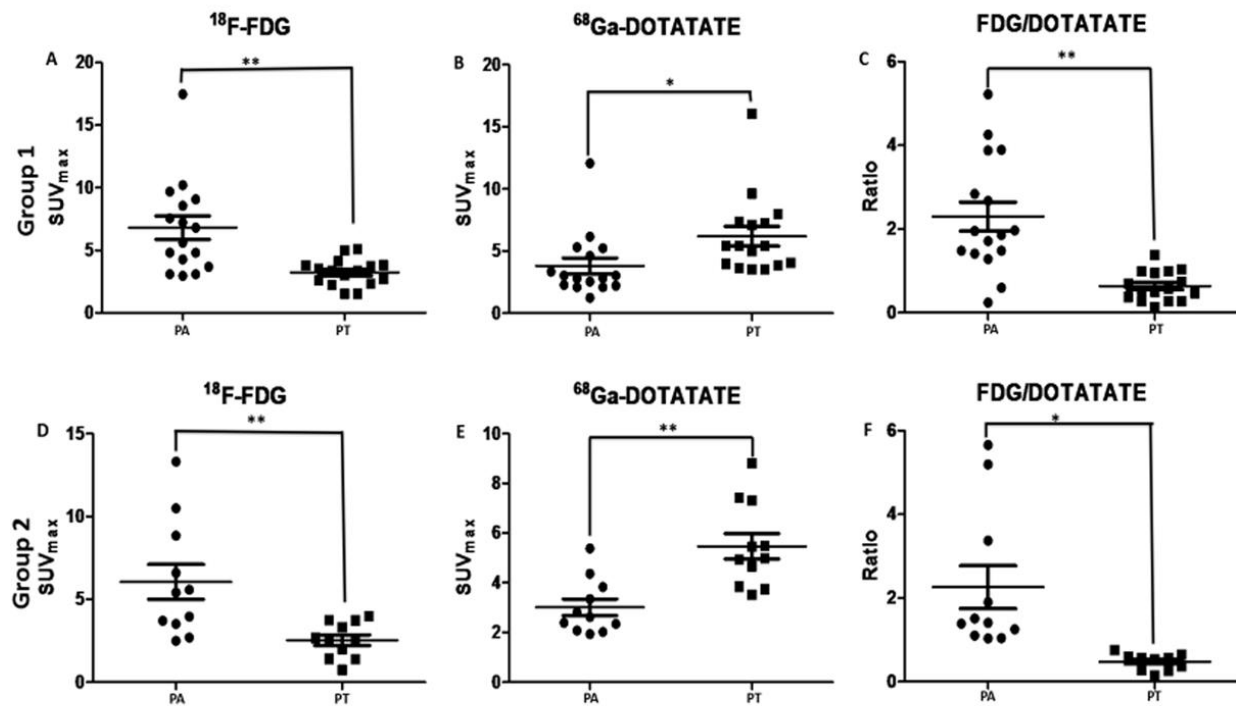

Supplemental Fig. 2 Comparison of  $^{18}\text{F}$ -FDG (A, D) and  $^{68}\text{Ga}$ -DOTATATE (B, E) uptake levels, and  $^{18}\text{F}$ -FDG over  $^{68}\text{Ga}$ -DOTATATE uptake ratio (C, F) between pituitary adenoma and pituitary tissue. Group 1: Undiagnosable primary pituitary adenoma patients (n = 16); Group 2: Recurrent pituitary adenoma patients (n = 11). PA: pituitary adenoma; PT: pituitary tissue; \*:  $P < 0.05$ ; \*\*:  $P < 0.01$
